# Supplementary material
Source: publisher site journal article supplement (https://www.dovepress.com/article/550232)
Supplement: Supplementary file 1 [file 550232%20Supplementary%20Material.docx]

| **Poison categories, n (%)** | **Age groups** | | | |  |  |
| --- | --- | --- | --- | --- | --- | --- |
| **Infants N = 21** | **Pre-school Children N = 699** | **School Children N = 123** | **Adolescents N = 485** | **Overall N = 1,328** | **p-value** |
| 1. **Pharmaceuticals** | | | | | | |
| **Antidepressants** | <5 | 8 (1.1%) | <5 | 12 (2.5%) | 24 (1.8%) | 0.154 |
| **Antiepileptics** | <5 | 26 (3.7%) | 7 (5.7%) | 26 (5.4%) | 61 (4.6%) | 0.288 |
| **Antihistamines** | <5 | 21 (3.0%) | <5 | 5 (1.0%) | 29 (2.2%) | 0.041* |
| **Antihypertensives** | <5 | 32 (4.6%) | <5 | 20 (4.1%) | 56 (4.2%) | 0.864 |
| **Antipsychotics** | <5 | 52 (7.4%) | 30 (24%) | 33 (6.8%) | 116 (8.7%) | 0.890 |
| **Atropine substitutes/Anticholinergics** | <5 | <5 | <5 | <5 | 7 (0.5%) | 0.294 |
| **Bronchodilators** | <5 | 21 (3.0%) | <5 | 24 (4.9%) | 52 (3.9%) | 0.458 |
| **Chemotherapeutics** | <5 | <5 | <5 | <5 | 7 (0.5%) | 0.890 |
| **Digitalis glycosides** | <5 | 14 (2.0%) | <5 | 7 (1.4%) | 21 (1.6%) | 0.498 |
| **Diuretics** | <5 | <5 | <5 | <5 | 10 (0.8%) | 0.759 |
| **D2 agonists** | <5 | 6 (0.9%) | <5 | <5 | 6 (0.5%) | 0.039* |
| **Ergot alkaloids** | <5 | <5 | <5 | <5 | <5 (0.2%) | 0.144 |
| **Iron** | <5 | 20 (2.9%) | <5 | <5 | 23 (1.7%) | 0.006* |
| **Multivitamins** | <5 | <5 | <5 | <5 | 5 (0.4%) | 0.341 |
| **Non-steroidal anti-inflammatory drugs** | <5 | 22 (3.1%) | <5 | 5 (1.0%) | 28 (2.1%) | 0.021* |
| **Opioids** | <5 | 14 (2.0%) | <5 | <5 | 19 (1.4%) | 0.126 |
| **Oral anticoagulants** | <5 | 9 (1.3%) | <5 | <5 | 10 (0.8%) | 0.019* |
| **Oral hypoglycemics** | <5 | 12 (1.7%) | <5 | 21 (4.3%) | 35 (2.6%) | 0.014* |
| **Paracetamol** | <5 | 20 (2.9%) | <5 | 22 (4.5%) | 43 (3.2%) | 0.180 |
| **Prokinetic D2 blockers** | <5 | 5 (0.7%) | <5 | <5 | 9 (0.7%) | 0.429 |
| **Psychostimulants** | <5 | 12 (1.7%) | <5 | <5 | 18 (1.4%) | <0.001* |
| **Sedative hypnotics** | <5 | 16 (2.3%) | <5 | 15 (3.1%) | 34 (2.6%) | 0.314 |
| **Skeletal muscle relaxants** | <5 | <5 | <5 | <5 | 7 (0.5%) | 0.294 |
| **Thyroxine** | <5 | 12 (1.7%) | <5 | <5 | 16 (1.2%) | 0.120 |
| 1. **Non-pharmaceuticals** | | | | | | |
| **Alcohol** | <5 | <5 | <5 | <5 | 8 (0.6%) | 0.568 |
| **Aluminum phosphide** | <5 | 20 (2.9%) | <5 | 79 (16%) | 103 (7.8%) | <0.001* |
| **Carbamate** | <5 | 14 (2.0%) | <5 | 26 (5.4%) | 42 (3.2%) | 0.001* |
| **Carbon monoxide** | <5 | <5 | 6 (4.9%) | 8 (1.6%) | 18 (1.4%) | 0.109 |
| **Corrosive** | <5 | 109 (16%) | 7 (5.7%) | 12 (2.5%) | 129 (9.7%) | <0.001* |
| **Hydrocarbon** | <5 | 62 (8.9%) | 7 (5.7%) | <5 | 76 (5.7%) | <0.001* |
| **Organophosphorus compounds** | <5 | 76 (11%) | 21 (17%) | 65 (13%) | 163 (12%) | 0.108 |
| **Pyrethroids** | <5 | 27 (3.9%) | <5 | 6 (1.2%) | 36 (2.7%) | 0.013* |
| **Zinc phosphide** | <5 | 35 (5.0%) | <5 | 70 (14%) | 110 (8.3%) | <0.001* |
| **Unknown** | <5 | <5 | <5 | <5 | <5 (0.3%) | 0.091 |

**Supplementary (1). Distribution of the ingested categories, including pharmaceutical and non-pharmaceutical p poisoning categories according to the age groups**

Note: Counts less than 5 are suppressed as "<5" to protect patient confidentiality. Percentages are only shown when the count is 5 or greater. * Indicating statistical significance at p < 0.05

**Supplementary (2). Distribution of recorded outcomes among pharmaceutical and non-pharmaceutical pediatric poisoning categories**

| **Poison categories** | **N = 1,328** | **Complications** | **PICU admission** | **Mortality** |
| --- | --- | --- | --- | --- |
| 1. **Pharmaceutical** | | | | |
| **Antidepressants** | 24 | <5 (<9%) | 0 (0.0%) | 0 (0.0%) |
| **Antiepileptics** | 61 | 6 (9.8%) | <5 | 0 (0.0%) |
| **Antihistamines** | 29 | 0 (0.0%) | 0 (0.0%) | 0 (0.0%) |
| **Antihypertensives** | 56 | <5 | 0 (0.0%) | 0 (0.0%) |
| **Antipsychotics** | 116 | 5 (4.3%) | 0 (0.0%) | 0 (0.0%) |
| **Atropine substitutes/Anticholinergics** | 7 | 0 (0.0%) | 0 (0.0%) | 0 (0.0%) |
| **Bronchodilators** | 52 | 6 (12%) | 0 (0.0%) | 0 (0.0%) |
| **Chemotherapeutics** | 7 | 0 (0.0%) | 0 (0.0%) | 0 (0.0%) |
| **Digitalis glycosides** | 21 | <5 | 0 (0.0%) | 0 (0.0%) |
| **Diuretics** | 10 | <5 | 0 (0.0%) | 0 (0.0%) |
| **D2 agonists** | 6 | 0 (0.0%) | 0 (0.0%) | 0 (0.0%) |
| **Ergot alkaloids** | <5 | 0 (0.0%) | 0 (0.0%) | 0 (0.0%) |
| **Iron** | 23 | 0 (0.0%) | 0 (0.0%) | 0 (0.0%) |
| **Multivitamins** | 5 | 0 (0.0%) | 0 (0.0%) | 0 (0.0%) |
| **Non-steroidal anti-inflammatory drugs** | 28 | 0 (0.0%) | 0 (0.0%) | 0 (0.0%) |
| **Opioids** | 19 | <5 | 0 (0.0%) | 0 (0.0%) |
| **Oral anticoagulants** | 10 | 0 (0.0%) | 0 (0.0%) | 0 (0.0%) |
| **Oral hypoglycemics** | 35 | <5 | 0 (0.0%) | 0 (0.0%) |
| **Paracetamol** | 43 | <5 | 0 (0.0%) | 0 (0.0%) |
| **Prokinetic D2 blockers** | 9 | 0 (0.0%) | 0 (0.0%) | 0 (0.0%) |
| **Psychostimulants** | 18 | <5 | 0 (0.0%) | 0 (0.0%) |
| **Sedative hypnotics** | 34 | 0 (0.0%) | 0 (0.0%) | 0 (0.0%) |
| **Skeletal muscle relaxants** | 7 | 0 (0.0%) | 0 (0.0%) | 0 (0.0%) |
| **Thyroxine** | 16 | <5 | 0 (0.0%) | 0 (0.0%) |
| 1. **Non-pharmaceutical** | | | | |
| **Alcohol** | 8 | <5 | 0 (0.0%) | 0 (0.0%) |
| **Aluminum phosphide** | 103 | 14 (14%) | 15 (15%) | 16 (16%) |
| **Carbamate** | 42 | <5 | 0 (0.0%) | 0 (0.0%) |
| **Carbon monoxide** | 18 | <5 | <5 | 0 (0.0%) |
| **Corrosive** | 129 | 22 (17%) | 0 (0.0%) | 0 (0.0%) |
| **Hydrocarbon** | 76 | 5 (6.6%) | 0 (0.0%) | 0 (0.0%) |
| **Organophosphorus compounds** | 163 | 5 (3.1%) | 0 (0.0%) | <5 |
| **Pyrethroids** | 36 | <5 | 0 (0.0%) | 0 (0.0%) |
| **Zinc phosphide** | 110 | <5 | 0 (0.0%) | <5 |
| **Unknown** | <5 | 0 (0.0%) | 0 (0.0%) | <5 |

Note: Counts less than 5 are suppressed as "<5" to protect patient confidentiality. Percentages are only shown when the count is 5 or greater

**Supplementary (3). Bootstrapping of the two models predicting mortality and pediatric intensive care unit admission among patients poisoned with non-pharmaceuticals**

|  | **Independent variables** | **Original coefficients** | **Bias** | **Mean bootstrapped coefficients (Bias corrected 95% Confidence interval)** | **p-value** |
| --- | --- | --- | --- | --- | --- |
| **Mortality predicting model**   - a Based on 10000 bootstrap samples - Bias-corrected AUC = 0.984 - Bias-corrected Nagelkerke’s pseudo R2 = 0.641 | **Intercept** | 0.22 | -1.75 | -1.53 (-5.06 to 24.31) | 0.673 |
| **Age (years)** | 0.12 | 0.06 | 0.18 (-0.10 to 0.23) | 0.013* |
| **Gender (Male)** | -1.01 | -1.01 | -2.02 (-5.10 to 3.79) | 0.273 |
| **Systolic blood pressure (mmHg)** | -0.09 | 0.01 | -0.08 (-0.26 to 0.02) | 0.155 |
| **Prehospital management (Yes)** | 3.53 | 1.61 | 5.14 (0.27 to 6.64) | <0.001* |
| **Creatinine (mg/dL)** | 2.66 | 0.83 | 3.49 (-3.92 to 6.70) | 0.107 |
| **White blood cells count (cell*109/L)** | 0.12 | 0.09 | 0.20 (-0.28 to 0.20) | 0.022* |
| **Diastolic blood pressure (mmHg)** | -0.04 | -0.06 | -0.10 (-0.19 to 0.16) | 0.235 |
| **PICU admission predicting model**   - a Based on 10000 bootstrap samples - Bias-corrected AUC = 0.994 - Bias-corrected Nagelkerke pseudo R2 = 0.732 | **Intercept** | -3.18 | -1.70 | -4.88 (-13.91 to 5.93) | 0.233 |
| **Age (years)** | 0.07 | 0.04 | 0.11 (-0.30 to 0.27) | 0.307 |
| **Gender (Male)** | 0.11 | 0.08 | 0.18 (-2.91 to 2.92) | 0.862 |
| **Aluminum phosphide poisoning** | 3.92 | 0.88 | 4.80 (1.74 to 13.48) | 0.001* |
| **Delay time (hr.)** | -1.28 | -0.35 | -1.63 (-3.89 to 0.15) | 0.179 |
| **Diastolic blood pressure (mmHg)** | -0.07 | -0.01 | -0.08 (-0.20 to 0.04) | 0.110 |
| **White blood cells count (cell*109/L)** | 0.22 | 0.06 | 0.27 (-0.22 to 0.62) | 0.069 |
| **Electrocardiographic abnormality** | 1.56 | 0.63 | 2.19 (-1.58 to 3.26) | 0.038* |

AUC: area under curve. * Indicating statistical significance at p < 0.05
